# Supplementary material for: Characterization of Wheat Yellow Rust Resistance in Bread Genotypes at Adult and Seedling Plant Resistance in South Ethiopia
Source: Research Square preprint supplement (doi:10.21203/rs.3.rs-8455355/v1), 2026-01-06
Supplement: Supplementary file 1 [file 2190ae65e148e924a9654b70.docx]

| **Appendix Table 5**: Final rust severity (FRS), reaction (**RXC**), coefficient of infection (CI), area under disease progress curve (AUDPC), relative area under disease progress curve (rAUDPC), disease progress rate (DPR), head infection (HI) and thousand seed weight(g)(TKW) values of bread wheat commercial cultivars and advanced lines evaluated under field condition at Bore and Ana sora districts, in 2020 main cropping season. | | | | | | | | | | | | | | | | | | |
| --- | --- | --- | --- | --- | --- | --- | --- | --- | --- | --- | --- | --- | --- | --- | --- | --- | --- | --- |
|  |  |  |  | **Bore** |  |  |  |  |  |  | **Ana sora** | |  |  |  |  |  |  |
| **plot** | **Genotype** | **FRS** | **RXC** | **CI** | **AUDPC** | **rAUDPC** | **HI** | **DPR** | **TKW** | **FRS** | **RXC** | **CI** | | **AUDPC** | **rAUDPC** | **DPR** | **HI** | **TKW** |
| 1 | ETBW 9116 | 50 | MS | 40 | 650 | 36.11 | 20 | 0.094 | 34.8 | 20 | MR | 8 | | 104.00 | 6.5 | 0.099 | 0 | 40.2 |
| 2 | ETBW 9119 | 60 | S | 60 | 880 | 48.89 | 20 | 0.084 | 33.2 | 20 | MS | 16 | | 240.00 | 15 | 0.077 | 20 | 34.8 |
| 3 | ETBW 9128 | 70 | S | 70 | 1175 | 65.28 | 80 | 0.1521 | 17.6 | 35 | S | 35 | | 505.00 | 31.563 | 0.086 | 20 | 32 |
| 4 | ETBW 9136 | 60 | S | 60 | 740 | 41.11 | 60 | 0.0749 | 26 | 20 | MS | 16 | | 194.00 | 12.125 | 0.013 | 0 | 40 |
| 5 | ETBW 9139 | 70 | S | 70 | 1110 | 61.67 | 60 | 0.1417 | 29.6 | 60 | S | 60 | | 1275.00 | 79.688 | 0.114 | 60 | 16 |
| 6 | ETBW 9149 | 50 | MS | 40 | 420 | 23.33 | 20 | 0.012 | 38.8 | 40 | MS | 32 | | 368.00 | 23 | 0.034 | 40 | 24.8 |
| 7 | ETBW 9065 | 80 | S | 80 | 1160 | 64.44 | 60 | 0.116 | 26 | 35 | MS | 28 | | 300.00 | 18.75 | 0.061 | 0 | 45.6 |
| 8 | ETBW 9077 | 70 | S | 70 | 870 | 48.33 | 20 | 0.13 | 27.6 | 20 | S | 20 | | 310.00 | 19.375 | 0.076 | 20 | 36 |
| 9 | ETBW 9078 | 40 | S | 40 | 550 | 30.56 | 40 | 0.084 | 20.8 | 40 | S | 40 | | 530.00 | 33.125 | 0.092 | 20 | 30 |
| 10 | ETBW 9080 | 40 | MS | 32 | 460 | 25.56 | 40 | 0.105 | 30.4 | 40 | MS | 32 | | 580.00 | 36.25 | 0.059 | 0 | 40 |
| 11 | ETBW 9452 | 70 | S | 70 | 1300 | 72.22 | 80 | 0.15 | 23.2 | 70 | S | 70 | | 1600.00 | 100 | 0.179 | 80 | 18.8 |
| 12 | Mitike | 30 | MS | 24 | 360 | 20.00 | 20 | 0.094 | 34.4 | 40 | MS | 32 | | 408.00 | 25.5 | 0.013 | 20 | 31.6 |
| 13 | Wane | 40 | MS | 32 | 740 | 41.11 | 20 | 0.0223 | 31.6 | 30 | MS | 24 | | 368.00 | 23 | 0.012 | 20 | 34 |
| 14 | Biqa | 50 | MS | 40 | 480 | 26.67 | 20 | 0.091 | 38 | 40 | S | 40 | | 724.00 | 45.25 | 0.011 | 40 | 26 |
| 15 | Dashin | 70 | S | 70 | 840 | 46.67 | 80 | 0.108 | 22.8 | 60 | S | 60 | | 1250.00 | 78.125 | 0.122 | 40 | 25 |
| 16 | ETBW 9647 | 60 | MS | 48 | 900 | 50.00 | 60 | 0.078 | 27.6 | 20 | MR | 8 | | 160.00 | 10 | 0.048 | 20 | 34 |
| 17 | ETBW 9648 | 80 | S | 80 | 1180 | 65.56 | 80 | 0.166 | 20.4 | 30 | S | 30 | | 500.00 | 31.25 | 0.071 | 20 | 31.6 |
| 18 | ETBW 9650 | 25 | MR | 10 | 85 | 4.72 | 0 | 0.0237 | 48.4 | 10 | MR | 4 | | 44.00 | 2.75 | 0.012 | 0 | 40.4 |
| 19 | ETBW 9651 | 50 | MS | 40 | 640 | 35.56 | 20 | 0.0882 | 33.2 | 20 | MR | 8 | | 160.00 | 10 | 0.048 | 0 | 44.8 |
| 20 | ETBW 9652 | 60 | MS | 48 | 800 | 44.44 | 40 | 0.0799 | 42 | 30 | MS | 24 | | 360.00 | 22.5 | 0.064 | 0 | 46.2 |
| 21 | ETBW 9653 | 95 | S | 95 | 1600 | 88.89 | 100 | 0.224 | 19.6 | 60 | S | 60 | | 1300.00 | 81.25 | 0.163 | 60 | 24.8 |
| 22 | ETBW 9543 | 45 | MS | 36 | 410 | 22.78 | 0 | 0.0426 | 42 | 10 | MR | 4 | | 44.00 | 2.75 | 0.012 | 0 | 37.6 |
| 23 | ETBW 9641 | 60 | S | 60 | 1175 | 65.28 | 60 | 0.1403 | 26 | 70 | S | 70 | | 1075.00 | 67.188 | 0.093 | 20 | 30 |
| 24 | ETBW 9642 | 40 | MS | 32 | 320 | 17.78 | 0 | 0.0501 | 50 | 20 | MR | 8 | | 80.00 | 5 | 0.014 | 0 | 36.8 |
| 25 | ETBW 9646 | 40 | MS | 32 | 160 | 8.89 | 0 | 0.0277 | 52.8 | 10 | R | 2 | | 22.00 | 1.375 | 0.016 | 0 | 36 |
| 26 | Hidase | 70 | MS | 56 | 780 | 43.33 | 20 | 0.0813 | 41.6 | 30 | S | 30 | | 418.00 | 26.125 | 0.058 | 0 | 46 |
| 27 | Senate | 60 | MS | 48 | 860 | 47.78 | 40 | 0.065 | 33.6 | 40 | MR | 16 | | 220.00 | 13.75 | 0.074 | 20 | 30 |
| 28 | ETBW 9654 | 40 | MS | 32 | 200 | 11.11 | 0 | 0.076 | 38.4 | 20 | MR | 8 | | 114.00 | 7.125 | 0.052 | 0 | 40.8 |
| 29 | ETBW 9655 | 20 | MR | 8 | 160 | 8.89 | 0 | 0.0277 | 49.2 | 25 | MR | 10 | | 154.00 | 9.625 | 0.01 | 0 | 48 |
| 30 | ETBW 9657 | 50 | MS | 40 | 560 | 31.11 | 0 | 0.0793 | 46 | 30 | S | 30 | | 480.00 | 30 | 0.079 | 0 | 42 |
| 31 | ETBW 9658 | 30 | MR | 12 | 280 | 15.56 | 0 | 0.0201 | 51.6 | 25 | MR | 10 | | 134.00 | 8.375 | 0.011 | 0 | 41.2 |
| 32 | ETBW 9661 | 50 | MS | 40 | 680 | 37.78 | 40 | 0.0662 | 26.4 | 20 | S | 20 | | 250.00 | 15.625 | 0.078 | 0 | 34 |
| 33 | BW174456 | 40 | MS | 32 | 610 | 33.89 | 60 | 0.0662 | 38.4 | 40 | MR | 16 | | 330.00 | 20.625 | 0.057 | 20 | 30 |
| 34 | BW174457 | 60 | S | 60 | 1080 | 60.00 | 20 | 0.1825 | 27.6 | 60 | S | 60 | | 1160.00 | 72.5 | 0.114 | 60 | 22 |
| 35 | Liban | 30 | MR | 12 | 220 | 12.22 | 0 | 0.0668 | 39.2 | 5 | R | 1 | | 7.00 | 0.4375 | 0 | 0 | 44 |
| 36 | BW174102 | 40 | S | 40 | 530 | 29.44 | 20 | 0.0925 | 41.6 | 20 | MR | 8 | | 200.00 | 12.5 | 0.076 | 0 | 46.4 |
| 37 | BW174116 | 40 | MS | 32 | 400 | 22.22 | 40 | 0.105 | 31.2 | 40 | MS | 32 | | 440.00 | 27.5 | 0.081 | 0 | 46 |
| 38 | BW174080 | 30 | MR | 12 | 180 | 10.00 | 0 | 0.0612 | 37.6 | 30 | MR | 12 | | 260.00 | 16.25 | 0.035 | 20 | 30 |
| 39 | BW172105 | 40 | S | 40 | 480 | 26.67 | 40 | 0.091 | 28.8 | 30 | MS | 24 | | 400.00 | 25 | 0.069 | 0 | 40 |
| 40 | BW172139 | 60 | S | 60 | 1025 | 56.94 | 80 | 0.154 | 20 | 40 | S | 40 | | 825.00 | 51.563 | 0.064 | 20 | 36 |
| 41 | BW172142 | 70 | S | 70 | 1110 | 61.67 | 80 | 0.1617 | 25.6 | 30 | MS | 24 | | 360.00 | 22.5 | 0.065 | 0 | 44.8 |
| 42 | BW172144 | 30 | S | 30 | 500 | 27.78 | 20 | 0.07 | 26 | 30 | MR | 12 | | 310.00 | 19.375 | 0.042 | 0 | 36.8 |
| 43 | BW172056 | 60 | MS | 48 | 960 | 53.33 | 20 | 0.0596 | 30 | 20 | MS | 8 | | 168.00 | 10.5 | 0.079 | 0 | 41.2 |
| 44 | BW172060 | 50 | MS | 40 | 560 | 31.11 | 20 | 0.0961 | 34.8 | 30 | MS | 24 | | 368.00 | 23 | 0.17 | 0 | 37.6 |
| 45 | BW172070 | 50 | MS | 40 | 370 | 20.56 | 0 | 0.0637 | 24.8 | 20 | MR | 8 | | 124.00 | 7.75 | 0.014 | 0 | 36 |
| 46 | BW172071 | 20 | MR | 8 | 80 | 4.44 | 0 | 0.0167 | 43.2 | 10 | R | 2 | | 22.00 | 1.375 | 0.016 | 0 | 38 |
| 47 | BW172088 | 60 | MS | 48 | 820 | 45.56 | 40 | 0.0788 | 31.2 | 50 | S | 50 | | 975.00 | 60.938 | 0.077 | 60 | 20 |
| 48 | BW172093 | 50 | MS | 40 | 365 | 20.28 | 20 | 0.0778 | 34.4 | 30 | MR | 12 | | 240.00 | 15 | 0.063 | 20 | 38 |
| 49 | Danda.a | 30 | MS | 24 | 460 | 25.56 | 0 | 0.034 | 40 | 40 | MS | 32 | | 320.00 | 20 | 0.05 | 20 | 36.8 |
| 50 | Dereselign | 30 | MR | 12 | 340 | 18.89 | 20 | 0.094 | 41.6 | 25 | MR | 10 | | 265.00 | 16.563 | 0.06 | 0 | 38.4 |
| 51 | BW174458 | 40 | MS | 32 | 640 | 35.56 | 40 | 0.055 | 31.2 | 30 | MR | 12 | | 200.00 | 12.5 | 0.064 | 0 | 44.4 |
| 52 | Digalu | 80 | S | 80 | 1750 | 97.22 | 80 | 0.294 | 18 | 80 | S | 80 | | 1475.00 | 92.188 | 0.176 | 60 | 20.4 |
| 53 | Hawi | 70 | S | 70 | 1200 | 66.67 | 80 | 0.129 | 22.4 | 50 | S | 50 | | 810.00 | 50.625 | 0.08 | 40 | 28.8 |
| 54 | Galama | 70 | S | 70 | 1075 | 59.72 | 60 | 0.0938 | 14.8 | 50 | S | 50 | | 1075.00 | 67.188 | 0.072 | 60 | 22 |
| 55 | ETBW 9185 | 10 | R | 2 | 20 | 1.11 | 0 | 0.0103 | 51.6 | 5 | R | 1 | | 5.00 | 0.3125 | 0 | 0 | 46.4 |
| 56 | ETBW 9193 | 50 | MS | 40 | 680 | 37.78 | 20 | 0.0662 | 36.8 | 20 | MR | 8 | | 104.00 | 6.5 | 0.099 | 40 | 26.8 |
| 57 | ETBW 9086 | 50 | MS | 40 | 420 | 23.33 | 20 | 0.07 | 40.8 | 10 | MR | 4 | | 34.00 | 2.125 | 0.099 | 0 | 36.2 |
| 58 | ETBW 9087 | 40 | MS | 32 | 290 | 16.11 | 20 | 0.0545 | 36.8 | 30 | MR | 12 | | 184.00 | 11.5 | 0.018 | 40 | 37.2 |
| 59 | ETBW 9109 | 50 | MS | 40 | 900 | 50.00 | 20 | 0.0678 | 46.4 | 50 | S | 50 | | 925.00 | 57.813 | 0.013 | 60 | 33.6 |
| 60 | Shorima | 60 | MS | 48 | 980 | 54.44 | 60 | 0.0761 | 22.8 | 40 | MS | 32 | | 500.00 | 31.25 | 0.074 | 40 | 35.2 |
| 61 | ETBW 9299 | 60 | MS | 48 | 1000 | 55.56 | 80 | 0.1563 | 20.4 | 10 | MR | 4 | | 32.00 | 2 | 0.092 | 0 | 44 |
| 62 | ETBW 9304 | 70 | S | 70 | 1220 | 67.78 | 80 | 0.1645 | 22 | 40 | MS | 32 | | 440.00 | 27.5 | 0.082 | 60 | 24 |
| 63 | ETBW 9313 | 60 | MS | 48 | 970 | 53.89 | 40 | 0.0853 | 26 | 30 | MR | 12 | | 240.00 | 15 | 0.081 | 0 | 44.8 |
| 64 | ETBW 9094 | 80 | S | 80 | 1850 | 102.78 | 80 | 0.178 | 18.8 | 40 | S | 40 | | 730.00 | 45.625 | 0.071 | 40 | 22 |
| 65 | ETBW 9066 | 70 | S | 70 | 1200 | 66.67 | 80 | 0.1516 | 24.4 | 60 | S | 60 | | 1005.00 | 62.813 | 0.07 | 20 | 36.4 |
| 66 | ETBW 9102 | 50 | S | 50 | 1100 | 61.11 | 80 | 0.1416 | 23.6 | 40 | S | 40 | | 700.00 | 43.75 | 0.06 | 60 | 19.6 |
| 67 | ETBW 9315 | 80 | S | 80 | 1850 | 102.78 | 80 | 0.198 | 20 | 50 | MS | 40 | | 480.00 | 30 | 0.091 | 20 | 34 |
| 68 | BW174459 | 60 | MS | 48 | 760 | 42.22 | 20 | 0.102 | 30 | 40 | S | 40 | | 605.00 | 37.813 | 0.099 | 40 | 28.4 |
| 69 | BW174460 | 40 | MS | 32 | 440 | 24.44 | 20 | 0.0806 | 38 | 50 | S | 50 | | 925.00 | 57.813 | 0.074 | 60 | 18.4 |
| 70 | Honqolo | 30 | MS | 24 | 460 | 25.56 | 20 | 0.0727 | 27.6 | 30 | MS | 24 | | 400.00 | 25 | 0.068 | 20 | 32 |
| 71 | BW174462 | 70 | S | 70 | 1275 | 70.83 | 60 | 0.142 | 24.4 | 20 | S | 20 | | 160.00 | 10 | 0.016 | 0 | 24.5 |
| 72 | BW174463 | 70 | MS | 56 | 1200 | 66.67 | 40 | 0.135 | 21.6 | 30 | MS | 24 | | 400.00 | 25 | 0.069 | 0 | 40 |
| 73 | BW174464 | 30 | MR | 12 | 160 | 8.89 | 0 | 0.0593 | 38 | 20 | MR | 8 | | 50.00 | 3.125 | 0.071 | 0 | 36 |
| 74 | BW174465 | 60 | MS | 48 | 940 | 52.22 | 60 | 0.0743 | 25.2 | 40 | MS | 32 | | 580.00 | 36.25 | 0.056 | 20 | 30 |
| 75 | BW174466 | 60 | MS | 48 | 980 | 54.44 | 40 | 0.0823 | 27.2 | 30 | S | 60 | | 650.00 | 40.625 | 0.017 | 60 | 21.2 |
| 76 | Kingbird | 30 | MS | 24 | 180 | 10.00 | 20 | 0.0612 | 36 | 30 | MR | 12 | | 200.00 | 12.5 | 0.064 | 20 | 34.4 |
| 77 | Alidoro | 30 | MR | 12 | 120 | 6.67 | 0 | 0.095 | 42.8 | 20 | MR | 8 | | 160.00 | 10 | 0.048 | 0 | 54 |
| 78 | ETBW 9284 | 5 | R | 1 | 5 | 0.28 | 0 | 0 | 54.4 | 5 | R | 1 | | 14.00 | 0.875 | 0 | 0 | 46.8 |
| 79 | Lemu | 50 | MS | 40 | 700 | 38.89 | 20 | 0.0683 | 23.2 | 20 | MR | 8 | | 100.00 | 6.25 | 0.073 | 20 | 30.4 |
| 80 | Ogolcho | 80 | S | 80 | 1650 | 91.67 | 80 | 0.1896 | 23.2 | 60 | S | 60 | | 1150.00 | 71.875 | 0.065 | 60 | 28 |
| 81 | Sinja | 25 | MR | 10 | 180 | 10.00 | 0 | 0.0013 | 45.2 | 10 | MR | 4 | | 44.00 | 2.75 | 0.002 | 0 | 34 |
| 82 | ETBW 9601 | 40 | MS | 32 | 260 | 14.44 | 0 | 0.0726 | 42 | 20 | MR | 8 | | 140.00 | 8.75 | 0.037 | 0 | 40.4 |
| 83 | ETBW 9233 | 30 | MS | 24 | 360 | 20.00 | 20 | 0.0653 | 41.2 | 20 | MR | 8 | | 100.00 | 6.25 | 0.073 | 0 | 36.4 |
| 84 | ETBW 9597 | 70 | S | 70 | 1450 | 80.56 | 60 | 0.1748 | 26.8 | 20 | MS | 16 | | 280.00 | 17.5 | 0.039 | 40 | 32.4 |
| 85 | ETBW 9606 | 70 | S | 70 | 1340 | 74.44 | 80 | 0.1687 | 20.4 | 45 | S | 45 | | 1025.00 | 64.063 | 0.051 | 20 | 42 |
| 86 | ETBW 9611 | 50 | MS | 40 | 840 | 46.67 | 60 | 0.0512 | 30.8 | 40 | MS | 32 | | 440.00 | 27.5 | 0.081 | 0 | 54 |
| 87 | ETBW 9613 | 60 | MS | 48 | 770 | 42.78 | 40 | 0.0931 | 30 | 30 | MR | 12 | | 360.00 | 22.5 | 0.065 | 0 | 54 |
| 88 | ETBW 9615 | 40 | MR | 16 | 210 | 11.67 | 40 | 0.0955 | 38 | 25 | MR | 10 | | 340.00 | 21.25 | 0.058 | 0 | 36.8 |
| 89 | ETBW 9616 | 40 | MS | 32 | 520 | 28.89 | 40 | 0.054 | 23.6 | 40 | S | 40 | | 550.00 | 34.375 | 0.084 | 20 | 36.8 |
| 90 | ETBW 9617 | 60 | MS | 48 | 640 | 35.56 | 40 | 0.101 | 26 | 40 | MS | 16 | | 220.00 | 13.75 | 0.074 | 0 | 48 |
| 91 | BW174461 | 30 | MR | 12 | 170 | 9.44 | 20 | 0.019 | 38.4 | 20 | MR | 8 | | 80.00 | 5 | 0 | 0 | 46 |
| 92 | ETBW 9619 | 60 | S | 60 | 975 | 54.17 | 80 | 0.0828 | 20 | 30 | MS | 24 | | 360.00 | 22.5 | 0.065 | 20 | 34 |
| 93 | ETBW 9623 | 60 | S | 60 | 920 | 51.11 | 60 | 0.0886 | 29.2 | 40 | MS | 32 | | 560.00 | 35 | 0.081 | 0 | 56.8 |
| 94 | Huluka | 30 | MS | 40 | 295 | 16.39 | 20 | 0.079 | 38 | 30 | MS | 24 | | 500.00 | 31.25 | 0.048 | 20 | 32.8 |
| 95 | ETBW 9635 | 50 | MS | 40 | 340 | 18.89 | 40 | 0.0583 | 30.4 | 20 | MR | 8 | | 160.00 | 10 | 0.048 | 20 | 38.8 |
| 96 | ETBW 9636 | 40 | MS | 32 | 330 | 18.33 | 20 | 0.0565 | 32 | 30 | MR | 12 | | 240.00 | 15 | 0.039 | 0 | 41.2 |
| 97 | BW174468 | 70 | S | 70 | 1090 | 60.56 | 80 | 0.1837 | 22.8 | 40 | S | 40 | | 700.00 | 43.75 | 0.06 | 40 | 30 |
| 98 | BW174469 | 60 | S | 60 | 1125 | 62.50 | 80 | 0.1849 | 20 | 30 | S | 30 | | 550.00 | 34.375 | 0.066 | 0 | 38 |
| 99 | BW174470 | 50 | S | 50 | 810 | 45.00 | 60 | 0.0795 | 38 | 20 | MS | 16 | | 208.00 | 13 | 0.042 | 0 | 46 |
| 100 | ETBW 9624 | 60 | MS | 48 | 730 | 40.56 | 60 | 0.1 | 32 | 35 | MR | 14 | | 280.00 | 17.5 | 0.051 | 0 | 50 |
| 101 | ETBW 9626 | 50 | S | 50 | 750 | 41.67 | 40 | 0.0972 | 30 | 30 | MS | 24 | | 258.00 | 16.125 | 0.119 | 0 | 48.8 |
| 102 | ETBW 9627 | 50 | MS | 40 | 660 | 36.67 | 40 | 0.112 | 30.4 | 15 | MR | 6 | | 50.00 | 3.125 | 0 | 0 | 45 |
| 103 | Kakaba | 60 | S | 60 | 1030 | 57.22 | 80 | 0.1693 | 22.8 | 20 | MS | 16 | | 208.00 | 13 | 0.042 | 20 | 32.8 |
| 104 | Millennium | 60 | S | 60 | 920 | 51.11 | 20 | 0.0545 | 43.6 | 20 | MS | 16 | | 208.00 | 13 | 0.042 | 20 | 34 |
| 105 | ETBW 9618 | 50 | MS | 40 | 640 | 35.56 | 20 | 0.0695 | 34 | 30 | MS | 24 | | 360.00 | 22.5 | 0.053 | 60 | 20 |
|  |  |  |  |  |  |  |  |  |  |  |  |  | |  |  |  |  |  |
| 106 | Hogana | 50 | MS | 40 | 500 | 27.78 | 60 | 0.0924 | 22 | 35 | MR | 14 | | 270.00 | 16.875 | 0.046 | 20 | 37.6 |
| 107 | Deka | 50 | MS | 40 | 300 | 16.67 | 40 | 0.0828 | 37.6 | 20 | MR | 8 | | 100.00 | 6.25 | 0.017 | 0 | 42 |
|  |  |  |  |  |  |  |  |  |  |  |  |  | |  |  |  |  |  |
| 108 | ETBW 9628 | 40 | MS | 32 | 400 | 22.22 | 40 | 0.0772 | 41.6 | 25 | MS | 20 | | 340.00 | 21.25 | 0.058 | 0 | 38 |

**Appendix Table 6**: Infection type values of bread wheat commercial cultivars and advanced lines evaluated under greenhouse condition , in 2020/21 main cropping season.

| Genotype | *Psts11* | *Pst 2 +v1 +v27* | | | Other | genotypes | *Psts11* | *Pst 2 +v1 +v27* | | | | Other |
| --- | --- | --- | --- | --- | --- | --- | --- | --- | --- | --- | --- | --- |
| ETBW 9116 | 2 | | 6 | 7 | | Galama | 8 | | 7 | | 7 | |
| ETBW 9119 | 7 | | 6 | 7 | | ETBW 9185 | 0 | | 2 | | 1 | |
| ETBW 9128 | 7 | | 8 | 7 | | ETBW 9193 | 0 | | 2 | | 2 | |
| ETBW 9136 | 8 | | 4 | 1 | | ETBW 9086 | 0 | | 4 | | 4 | |
| ETBW 9139 | 3 | | 7 | 7 | | ETBW 9087 | 7 | | 3 | | 7 | |
| ETBW 9149 | 7 | | 1 | 1 | | ETBW 9109 | 2 | | 4 | | 2 | |
| ETBW 9065 | 7 | | 2 | 7 | | Shorima | 4 | | 6 | | 8 | |
| ETBW 9077 | 6 | | 2 | 7 | | ETBW 9299 | 0 | | 1 | | 7 | |
| ETBW 9078 | 7 | | 3 | 2 | | ETBW 9304 | 5 | | 0 | | 7 | |
| ETBW 9080 | 6 | | 6 | 0 | | ETBW 9313 | 0 | | 1 | | 1 | |
| ETBW 9452 | 7 | | 7 | 7 | | ETBW 9094 | 5 | | 3 | | 7 | |
| Mitike | 6 | | 7 | 7 | | ETBW 9066 | 2 | | 4 | | 2 | |
| Wane | 7 | | 7 | 6 | | ETBW 9102 | 3 | | 7 | | 2 | |
| Biqa | 6 | | 7 | 2 | | ETBW 9315 | 4 | | 1 | | 2 | |
| Dashin | 7 | | 7 | 7 | | BW174459 | 6 | | 1 | | 2 | |
| ETBW 9647 | 6 | | 6 | 3 | | BW174460 | 7 | | 1 | | 7 | |
| ETBW 9648 | 6 | | 0 | 0 | | Honqolo | 1 | | 7 | | 7 | |
| ETBW 9650 | 6 | | 7 | 7 | | BW174462 | 3 | | 2 | | 1 | |
| ETBW 9651 | 1 | | 3 | 4 | | BW174463 | 5 | | 1 | | 0 | |
| ETBW 9652 | 8 | | 6 | 8 | | BW174464 | 7 | | 3 | | 0 | |
| ETBW 9653 | 7 | | 6 | 7 | | BW174465 | 0 | | 1 | | 0 | |
| Kubsan | 7 | | 7 | 7 | | BW174466 | 1 | | 3 | | 8 | |
| Enkoy | 4 | | 3 | 3 | | Kingbird | 2 | | 7 | | 7 | |
| Pavon-76 | 6 | | 2 | 5 | | Alidoro | 2 | | 0 | | 4 | |
| ETBW 9543 | 7 | | 6 | 0 | | ETBW 9284 | 0 | | 5 | | 6 | |
| ETBW 9641 | 8 | | 6 | 7 | | Lemu | 0 | | 5 | | 3 | |
| ETBW 9642 | 3 | | 0 | 0 | | Ogolcho | 7 | | 8 | | 8 | |
| ETBW 9646 | 3 | | 0 | 1 | | SINJA | 1 | | 6 | | 4 | |
| Hidase | 6 | | 2 | 7 | | ETBW 9601 | 2 | | 5 | | 3 | |
| Senate | 6 | | 4 | 6 | | ETBW 9233 | 5 | | 4 | | 5 | |
| ETBW 9654 | 3 | | 8 | 1 | | ETBW 9597 | 3 | | 4 | | 4 | |
| ETBW 9655 | 6 | | 1 | 1 | | ETBW 9606 | 3 | | 7 | | 5 | |
| ETBW 9657 | 3 | | 1 | 7 | | ETBW 9611 | 0 | | 5 | | 4 | |
| ETBW 9658 | 6 | | 3 | 4 | | ETBW 9613 | 7 | | 5 | | 7 | |
| ETBW 9661 | 7 | | 2 | 1 | | ETBW 9615 | 0 | | 7 | | 4 | |
| BW174456 | 3 | | 7 | 2 | | ETBW 9616 | 0 | | 3 | | 7 | |
| BW174457 | 7 | | 1 | 8 | | ETBW 9617 | 0 | | 3 | | 6 | |
| liban | 4 | | 1 | 4 | | BW174461 | 8 | | | 3 | 3 | |
| BW174102 | 3 | | 1 | 1 | | ETBW 9619 | 1 | | | 7 | 8 | |
| BW174116 | 6 | | 1 | 1 | | ETBW 9623 | 2 | | | 5 | 4 | |
| BW174080 | 0 | | 1 | 3 | | Huluka | 2 | | | 4 | 4 | |
| BW172105 | 0 | | 8 | 3 | | ETBW 9635 | 1 | | | 3 | 3 | |
| BW172139 | 7 | | 2 | 2 | | ETBW 9636 | 0 | | | 6 | 6 | |
| BW172142 | 7 | | 7 | 7 | | BW174468 | 1 | | | 3 | 7 | |
| BW172144 | 0 | | 0 | 7 | | BW174469 | 1 | | | 5 | 2 | |
| BW172056 | 0 | | 3 | 2 | | BW174470 | 0 | | | 0 | 7 | |
| BW172060 | 7 | | 8 | 3 | | ETBW 9624 | 8 | | | 7 | 8 | |
| BW172070 | 0 | | 1 | 2 | | ETBW 9626 | 7 | | | 8 | 8 | |
| BW172071 | 0 | | 0 | 2 | | ETBW 9627 | 3 | | | 6 | 7 | |
| BW172088 | 7 | | 2 | 1 | | Kakaba | 3 | | | 6 | 7 | |
| BW172093 | 0 | | 2 | 3 | | Millennium | 7 | | | 7 | 8 | |
| Danda.a | 5 | | 1 | 3 | | ETBW 9618 | 5 | | | 4 | 3 | |
| Dereselign | 0 | | 1 | 7 | | Hogana | 7 | | | 7 | 7 | |
| BW174458 | 0 | | 2 | 0 | | Daka | 7 | | | 8 | 8 | |
| Digalu | 9 | | 6 | 8 | | ETBW 9628 | 8 | | | 7 | 7 | |
| Hawi | 7 | | 0 | 7 | | Moroco | 9 | | | 8 | 8 | |

Appendix Table 3: List and pedigree of bread wheat advanced lines and varieties were resistance evaluation to yellow rust.

|  | Genotype | Pedigree |
| --- | --- | --- |
| 1 | ETBW 9116 | PFAU/MILAN/5/CHEN/AEGILOPSSQUARROSA(TAUS)//BCN/3/VEE#7/BOW/4/PASTOR/6/KINGBIRD #1 |
| 2 | ETBW 9119 | ELVIRA/5/CNDO/R143//ENTE/MEXI75/3/AE.SQ/4/2*OCI/6/VEE/PJN//KAUZ/3/PASTOR/7/TILHI/4/CROC_1/ AE. SQUARROSA (213) //PGO/3/CMH81.38/2*KAUZ/8/PICAFLOR #2 |
| 3 | ETBW 9128 | FRNCLN*2/BECARD |
| 4 | ETBW 9136 | 92.001E7.32.5/SLVS/5/NS732/HER/3/PRL/SARA//TSI/VEE#5/4/FRET2/6/SOKOLL/3/PASTOR//HXL7573/2*BAU |
| 5 | ETBW 9139 | KA/NAC//TRCH/5/W15.92/4/PASTOR//HXL7573/2*BAU/3/WBLL1 |
| 6 | ETBW 9149 | PRL/2*PASTOR/6/TRAP#1/BOW/3/VEE/PJN//2*TUI/4/BAV92/RAYON/5/KACHU #1 |
| 7 | ETBW 9065 | FALCIN/AE.SQUARROSA(312)/3/THB/CEP7780//SHA4/LIRA/4/FRET2/5/DANPHE#1/11/CROC_1/AE.SQUARROSA (213) //PGO/10/ ATTILA*2/9/KT/BAGE//FN/U/3/BZA/4/TRM/5/ALDAN/6/SERI/7/VEE#10/8/OPATA |
| 8 | ETBW 9077 | SHORTENEDSR26TRANSLOCATION//2*WBLL1*2/KKTS/3/BECARD |
| 9 | ETBW 9078 | SWSR22T.B./2*BLOUK #1//WBLL1*2/KURUKU |
| 10 | ETBW 9080 | KACHU//WHEAR/SOKOLL |
| 11 | ETBW 9452 | REBWAH-19/HAAMA-14 |
| 12 | ETBW 9543 | KFA//PBW343/PASTOR/3/PBW343*2/KUKUNA/4/PBW343*2/KUKUNA*2//FRTL/PIFED/5/PBW343*2/KUKUNA*2//FRTL/PIFED |
| 13 | ETBW 9641 | MELON//FILIN/MILAN/3/FILIN/4/PRINIA/PASTOR//HUITES/3/MILAN/OTUS//ATTILA/3*BCN/5/MELON//FILIN/MILAN/3/FILIN |
| 14 | ETBW 9642 | SOKOLL/3/PASTOR//HXL7573/2*BAU/4/WHEAR/SOKOLL |
| 15 | ETBW 9646 | SOKOLL/3/PASTOR//HXL7573/2*BAU/4/PARUS/PASTOR |
| 16 | ETBW 9647 | SOKOLL/3/PASTOR//HXL7573/2*BAU/4/MEX94.2.19//SOKOLL/WBLL1 |
| 17 | ETBW 9648 | PUB94.15.1.12/FRTL//92.001E7.32.5/SLVS |
| 18 | ETBW 9650 | SOKOLL/3/PASTOR//HXL7573/2*BAU/4/GLADIUS |
| 19 | ETBW 9651 | KACHU*2/3/ND643//2*PRL/2*PASTOR |
| 20 | ETBW 9652 | PFUNYE #1/KINGBIRD #1 |
| 21 | ETBW 9185 | KISKADEE#1/5/KAUZ*2/MNV//KAUZ/3/MILAN/4/BAV92/6/WHEAR//2*PRL/2*PASTOR |
| 22 | ETBW 9193 | CHWINK/GRACKLE #1//FRNCLN |
| 23 | ETBW 9086 | MINO/898.97/4/2*PFAU/SERI.1B//AMAD/3/KRONSTAD F2004 |
| 24 | ETBW 9087 | ATTILA/3/URES/PRL//BAV92/4/WBLL1/5/CHYAK1/6/NAVJ07 |
| 25 | ETBW 9109 | PFAU/MILAN/3/BABAX/LR42//BABAX/8/JUP/ZP//COC/3/PVN/4/TNMU/5/TNMU/6/SITE/7/TNMU |
| 26 | ETBW 9284 | PRL/2*PASTOR//WAXWING*2/KRONSTADF2004/4/PBW343*2/KUKUNA//KRONSTAD F2004/3/PBW343*2/KUKUNA |
| 27 | ETBW 9299 | WHEAR/SOKOLL/4/WBLL1/KUKUNA//TACUPETOF2001/3/UP2338 *2/ VIVITSI |
| 28 | ETBW 9304 | CROC_1/AE.SQUARROSA (205) //BORL95/3/PRL/SARA//TSI/VEE#5 /4/FRET2*2/5/WHEAR/SOKOLL |
| 29 | ETBW 9313 | ROLF07/YANAC//TACUPETOF2001/BRAMBLING*2/3/WHEAR //2* PRL/2*PASTOR |
| 30 | ETBW 9094 | THELIN/3/BABAX/LR42//BABAX/4/BABAX/LR42//BABAX*2/5/KIRITATI/2*TRCH |
| 31 | ETBW 9066 | PRL/2*PASTOR/4/CHOIX/STAR/3/HE1/3*CNO79//2*SERI/5/KIRITATI/2*TRCH |
| 32 | ETBW 9102 | CETA/AE.SQUARROSA (174)//2*MUU |
| 33 | ETBW 9315 | BABAX/LR42//BABAX/3/ER2000/11/CROC_1/AE.SQUARROSA (213)//PGO/10/ATTILA*2/9/KT/BAGE//FN/U/3/BZA/4/TRM/5/ ALDAN /6/ SERI/7/VEE#10/8/OPATA/12/BAVIS |
| 34 | BW174459 | THELIN/WAXWING//ATTILA*2/PASTOR/3/INQALAB91*2/TUKURU 9Y-0B |
| 35 | BW174460 | PASTOR//HXL7573/2*BAU/3/SOKOLL/WBLL1/4/SAFI-1//NS732/ HER/3/SAADA, |
| 36 | BW174461 | PASTOR//HXL7573/2*BAU/3/SOKOLL/WBLL1/4/SAFI-1//NS732/ HER /3/SAADA, |
| 37 | BW174462 | PASTOR//HXL7573/2*BAU/3/SOKOLL/WBLL1/4/SAFI-1//NS732/ HER/3/SAADA |
| 38 | BW174463 | SERI.1B//KAUZ/HEVO/3/AMAD/4/ESWYT99#18/ARRIHANE/5/SITTA/BUCHIN//CHIL/BOMB |
| 39 | BW174464 | PFAU/MILAN//FUNG MAI 24/3/ATTILA*2/CROW |
| 40 | BW174465 | FLORKWA-2/85 Z 1284//ETBW 4920/3/LOULOU-18 |
| 41 | BW174466 | SHARP/3/PRL/SARA//TSI/VEE#5/5/VEE/LIRA//BOW/3/BCN/4/KAUZ/6/HUBARA-5 |
| 42 | ETBW 9601 | KACHU*2/MUNAL #1 |
| 43 | ETBW 9233 | W15.92/4/PASTOR//HXL7573/2*BAU/3/WBLL1/6/VEE/MJI//2*TUI/3/2*PASTOR/4/BERKUT/5/PFAU/MILAN |
| 44 | ETBW 9597 | C80.1/3*BATAVIA//2*WBLL1/5/REH/HARE//2*BCN/3/CROC_1/AE.SQUARROSA (213) //PGO/4/HUITES/6/FRANCOLIN #1/BLOUK #1 |
| 45 | ETBW 9606 | NGL//2*WHEAR/SOKOLL |
| 46 | ETBW 9611 | NGL//2*WHEAR/SOKOLL |
| 47 | ETBW 9613 | SERI.1B//KAUZ/HEVO/3/AMAD*2/4/KIRITATI*2/6/BAV92//IRENA/KAUZ/3/HUITES/4/T.SPELTAPI348764/5/BAV92//IRENA/KAUZ/3/HUITES |
| 48 | ETBW 9615 | SIALIA/4/PBW343*2/KUKUNA//SRTU/3/PBW343*2/KHVAKI/5/SAUAL/3/C80.1/3*BATAVIA//2*WBLL1/4/SAUAL #1 |
| 49 | ETBW 9616 | SIALIA/4/PBW343*2/KUKUNA//SRTU/3/PBW343*2/KHVAKI/5/SAUAL/3/C80.1/3*BATAVIA//2*WBLL1/4/SAUAL #1 |
| 50 | ETBW 9617 | SOKOLL/3/PASTOR//HXL7573/2*BAU*2/4/PAURAQ |
| 51 | ETBW 9618 | SOKOLL/3/PASTOR//HXL7573/2*BAU/4/PARUS/PASTOR |
| 52 | ETBW 9619 | SUP152//PUB94.15.1.12/WBLL1 |
| 53 | ETBW 9623 | WBLL1/KUKUNA//TACUPETOF2001/6/PVN//CAR422/ANA/5/BOW/CROW//BUC/PVN/3/YR/4/TRAP#1/7/CNO79//PF70354/MUS/3/PASTOR/4/BAV92*2/5/FH6-1-7 |
| 54 | ETBW 9624 | WBLL1/KUKUNA//TACUPETOF2001/6/PVN//CAR422/ANA/5/BOW/CROW//BUC/PVN/3/YR/4/TRAP#1/7/CNO79//PF70354/MUS/3/PASTOR/4/BAV92*2/5/FH6-1-7 |
| 55 | ETBW 9626 | BAV92//IRENA/KAUZ/3/HUITES*2/4/MURGA/6/CNO79//PF70354/MUS/3/PASTOR/4/BAV92*2/5/FH6-1-7/7/FRNCLN*2/TECUE #1 |
| 56 | ETBW 9627 | KACHU#1/6/NG8201/KAUZ/4/SHA7//PRL/VEE#6/3/FASAN/5/MILAN/KAUZ/7/KACHU/8/KZA//WH542/2*PASTOR/3/BACEU#1/9/KACHU #1/KIRITATI//KACHU |
| 57 | ETBW 9628 | TACUPETOF2001/SAUAL//BLOUK#1/3/SAUAL/YANAC//SAUAL/4/TACUPETO F2001/SAUAL//BLOUK #1 |
| 58 | ETBW 9635 | REEDLING #1//KFA/2*KACHU |
| 59 | ETBW 9636 | KFA/2*KACHU/3/KINGBIRD#1//INQALAB91*2/TUKURU/4/KFA/2*KACHU |
| 60 | BW174468 | KAUZ/FCT//ETBW 4920/3/MILAN/PASTOR |
| 61 | BW174469 | HUW 234/REBWAH-19 |
| 62 | BW174470 | FLORKWA-2/85 Z 1284//ETBW 4920/3/LOULOU-18 |
| 63 | ETBW 9653 | SHA7//PRL/VEE#6/3/FASAN/4/HAAS8446/2*FASAN/5/CBRD/KAUZ/6/MILAN/AMSEL/7/FRET2*2/KUKUNA/8/KINGBIRD #1 |
| 64 | ETBW 9654 | SOKOLL/3/PASTOR//HXL7573/2*BAU*2/4/PASTOR//MILAN/KAUZ/3/BAV92 |
| 65 | ETBW 9655 | WBLL1/KUKUNA//TACUPETO F2001/3/BAJ #1*2/4/KINGBIRD #1 |
| 66 | ETBW 9657 | CNO79//PF70354/MUS/3/PASTOR/4/BAV92*2/5/HAR311/6/PBW343*2/KUKUNA*2//FRTL/PIFED/7/CNO79//PF70354/MUS/3/PASTOR/4/BAV92*2/5/HAR311 |
| 67 | ETBW 9658 | KFA/2*KACHU*2//QUELEA |
| 68 | ETBW 9661 | KAUZ//MON/CROW? S? /4/SERI.1B//KAUZ/HEVO/3/AMAD |
| 69 | BW174456 | REBWAH-11/QIMMA-12 |
| 70 | BW174457 | FLORKWA-2/85 Z 1284//ETBW 4920/3/LOULOU-18 |
| 71 | BW174458 | KRICHAUFF/2*PASTOR//SHUHA-8/DUCULA |
| 72 | BW174102 | HUBARA1/5/CHEN/AEGILOPSSQUARROSA(TAUS)//BCN/3/VEE#7/BOW/4/PASTOR |
| 73 | BW174116 | CHAM-4/MUBASHIIR-9 |
| 74 | BW174080 | SERI.1B//KAUZ/HEVO/3/AMAD*2/4/ATTILA//PSN/BOW/3/ATTILA |
| 75 | BW172105 | INQALAB91*2/KUKUNA//PFAU/WEAVER/3/INQALAB91*2/KUKUNA/4/TRCH/SRTU//KACHU |
| 76 | BW172139 | ATTILA*2/PBW65//PIHA/3/ATTILA/2*PASTOR*2/5/SERI.1B//KAUZ/HEVO/3/AMAD*2/4/KIRITATI |
| 77 | BW172142 | BECARD #1/CIRNO C 2008//BECARD |
| 78 | BW172144 | BAVIS #1/5/W15.92/4/PASTOR//HXL7573/2*BAU/3/WBLL1 |
| 79 | BW172056 | SUP152/3/TRCH/SRTU//KACHU |
| 80 | BW172060 | WHEAR/KUKUNA/3/C80.1/3*BATAVIA//2*WBLL1*2/6/WBLL1*2/4/YACO/PBW65/3/KAUZ*2/TRAP//KAUZ/5/KACHU #1 |
| 81 | BW172070 | PRL/2*PASTOR/3/2*TRCH/SRTU//KACHU |
| 82 | BW172071 | FRANCOLIN #1/3/PBW343*2/KUKUNA*2//YANAC/4/KINGBIRD #1//INQALAB 91*2/TUKURU |
| 83 | BW172088 | W15.92/4/PASTOR//HXL7573/2*BAU/3/WBLL1/8/BOW/VEE/5/ND/VG9144//KAL/BB/3/YACO/4/CHIL/6/CASKOR/3/CROC_1/AE.SQUARROSA (224) //OPATA/7/PASTOR//MILAN/KAUZ/3/BAV92 |
| 84 | BW172093 | SOKOLL/3/PASTOR//HXL7573/2*BAU*2/6/OASIS/5*BORL95/5/CNDO/R143//ENTE/MEXI75/3/AE.SQ/4/2*OCI |
| 85 | Enkoy | HEBRANDSAL/WIS24/SUP51/(FR/FN/Y)2OrHEBRARD//WISCONSIN- 245/SUPREMO-51/3/2*FROCOR/F RONTANA//YAQU |
| 86 | Kakaba | KIRITATI/SERI/RAYO |
| 87 | Millennium | ALD/CEP75630//CEP75234/PT7219/3/BUC/BIY/4/ |
| 88 | Huluka | UTQUE96/3/PYN/BAU//MILAN |
| 89 | Hogana | PAYNE/BAGULA//MILAN; |
| 90 | Daka | ATTILA/3*BCN*2//BAV92/3/KIRITATI/WBLL1/4/DANPHE |
| 91 | Kingbird | TAM200/TUI/6/PVN//CAR422/ANA/5/BOW/CROW//BUC/PVN/3/YR/4/TRAP#1 |
| 92 | Alidoro | HK-14-R251 |
| 93 | Honqolo | NJORO SD-7 |
| 94 | Lemu | WAXWING*2/HEILO |
| 95 | Ogolcho | WORRAKATTA/2*PASTOR |
| 96 | Danda.a | KIRITATI//2*PBW65/2*SERI.1B |
| 97 | Pavon-76 | VCM//CNO"S"/7C/3/KAL/BB |
| 98 | Dereselign | CI-8154/2*FR |
| 99 | Shorima | UTIQUE-96/3/PAYNE/BAGULA//MILAN; |
| 100 | Digelu | SHA7/KAUZ |
| 101 | Hawi | CHIL/PRL |
| 102 | Kubsa (check) | ATTILA |
| 103 | Galama | 4777(2) //FKN/GB/3/PVN"S" |
| 104 | Mitike | FSYR20.6/87 BOW28) X (RBC (ET1297) |
| 105 | Wane | SOKOLL/EXCALIBUR |
| 106 | Liban | DUKULA/KAUZ/6/PSN/BOW/4/MAYA/NACO/3 |
| 107 | Biqa’a | PASTOR//HXL7573/2*BAU/3/WBLL1 |
| 108 | Dashen | VEE #17, KVZ/BUHO"S"//KAL/BB |
| 109 | Hidase | YANAC/3/PRL/SARA//TSI/VEE#5/4/CROC-1/AE.SQUAROSA (224)// OPATTA |
| 110 | Sanate | 14F/HAR 1685 |

111 Sinja Dure/Madawalabu 2005 SNc
